# Supplementary material for: Design optimization of CsPbBr3 nanocrystals into zeolite Beta composites as ultra-stable green emitters for backlight display applications
Source: Royal Society of Chemistry journal article supplement (doi:10.1039/d1tc02757c), 2021-01-01
Supplement: d1tc02757c1.pdf [file d1tc02757c1.pdf]

## Electronic Supplementary Information

### Design Optimization of CsPbBr<sub>3</sub> Nanocrystals into Zeolite Beta as Ultra-Stable Green Emitters for Backlight Display Applications

Bohan Li <sup>a</sup>, Yuchi Zhang <sup>a</sup>, Yan Xu <sup>\*a</sup> and Zhiguo Xia <sup>\*b</sup>

<sup>a</sup> Department of Chemistry, College of Sciences, Northeastern University, Shenyang, Liaoning, 110819, China. Email: xuyan@mail.neu.edu.cn

<sup>b</sup> School of Physics and Optoelectronics, State Key Laboratory of Luminescent Materials and Devices, South China University of Technology, Guangzhou, 510641, China. Email: xiazg@scut.edu.cn

#### Figure captions

**Fig. S1 a** XRD patterns of zeolite Beta **b** SEM image of pure zeolite Beta.

**Fig. S2** UV-Vis absorption spectra of CsPbBr<sub>3</sub>-Beta at different calcination temperature when the mass ratio of (CsBr + PbBr<sub>2</sub>): Zeolite Beta = 1: 5.

**Fig. S3** UV-Vis absorption spectra of CsPbBr<sub>3</sub>-Beta at different mass ratio when calcined at 600 °C.

**Fig. S4** Absorption (black line) and emission (green line) spectra of CsPbBr<sub>3</sub>-Beta. Inset is its photograph under sunlight and UV illumination at 365 nm.

**Fig. S5 a** XPS spectrum of CsPbBr<sub>3</sub>-Beta composite; **b** Cs 3d, Pb 4f, Br 3d, Si 2p, O 1s spectra of CsPbBr<sub>3</sub>-Beta composite, respectively.

**Fig. S6** Surface area and pore size of pristine beta and CsPbBr<sub>3</sub>-Beta (CsBr + PbBr<sub>2</sub> : Zeolite Beta = 1: 5) calculated with BET/BJH method.

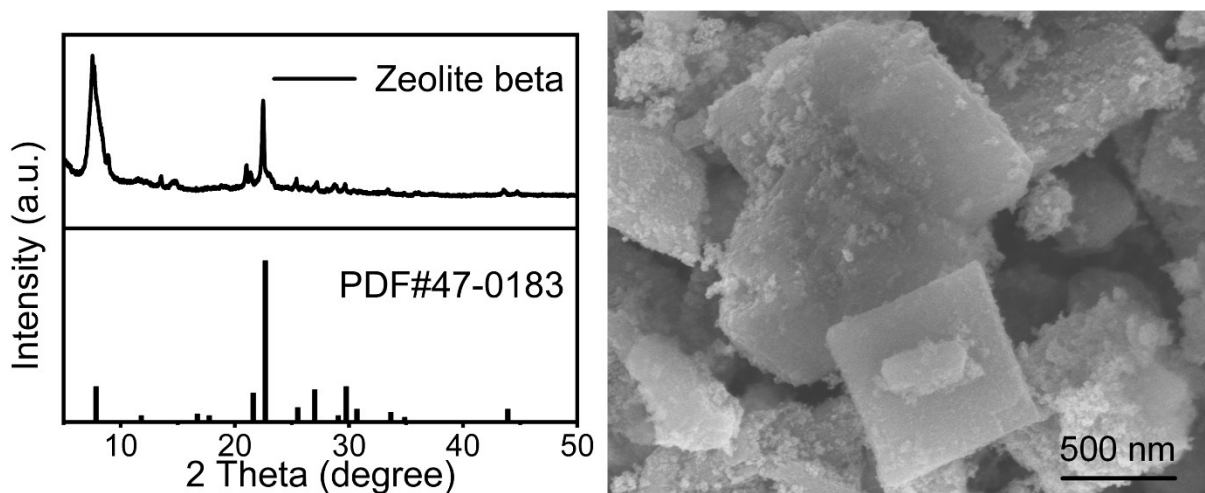

**Fig. S1 a** XRD patterns of zeolite Beta **b** SEM image of pure zeolite Beta.

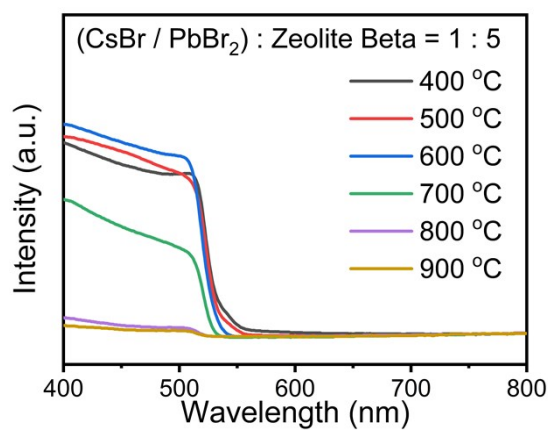

**Fig. S2** UV-Vis absorption spectra of CsPbBr<sub>3</sub>-Beta at different calcination temperature when the mass ratio of (CsBr + PbBr<sub>2</sub>): Zeolite Beta = 1 : 5.

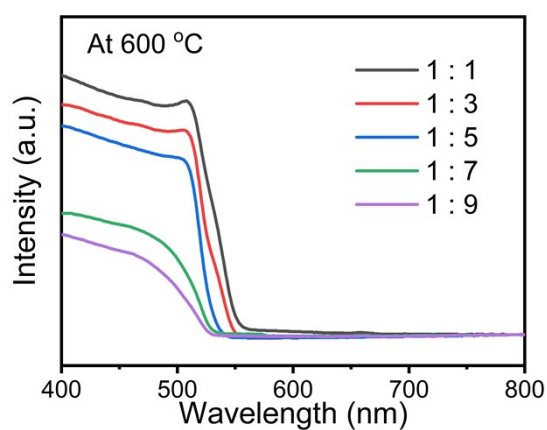

**Fig. S3** UV-Vis absorption spectra of CsPbBr<sub>3</sub>-Beta at different mass ratio when calcined at 600 °C.

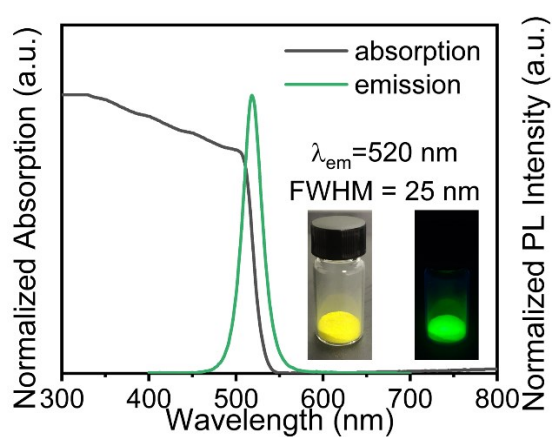

**Fig. S4** Absorption (black line) and emission (green line) spectra of CsPbBr<sub>3</sub>-Beta. Inset is its photograph under sunlight and UV illumination at 365 nm.

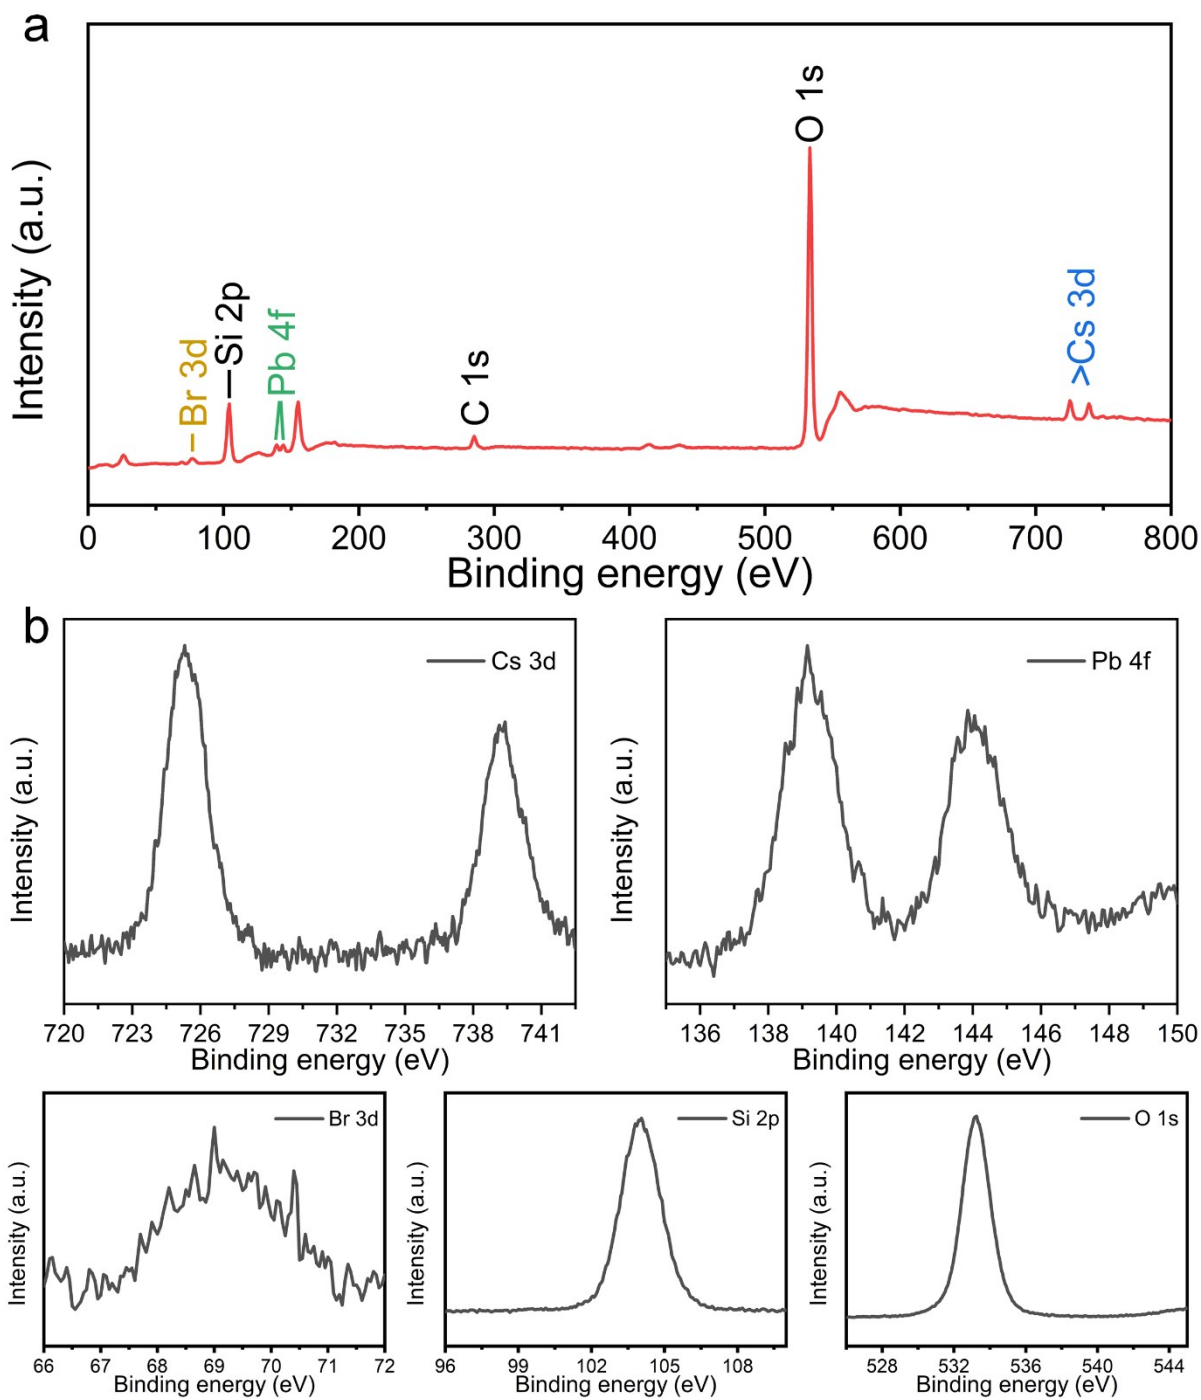

**Fig. S5** **a** XPS spectrum of CsPbBr<sub>3</sub>-Beta composite; **b** Cs 3d, Pb 4f, Br 3d, Si 2p, O 1s spectra of CsPbBr<sub>3</sub>-Beta composite, respectively.

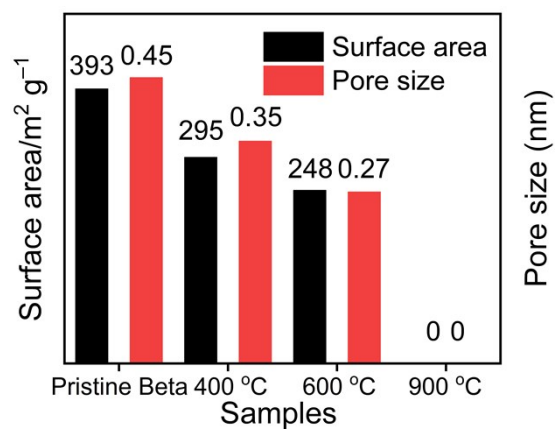

**Fig. S6** Surface area and pore size of pristine beta and CsPbBr<sub>3</sub>-Beta (CsBr + PbBr<sub>2</sub> : Zeolite Beta =1:5) calculated with BET/BJH method.
